# Supplementary material
Source: publisher site journal article supplement (http://e-cmh.org/upload/media/cmh-2023-0328-Supplementary-Table-5.pdf)
Supplement: Supplementary file 1 [file cmh-2023-0328-Supplementary-Table-5.pdf]

**Supplementary Table 5.** Changes in lipid profiles during the study period in patients who did not receive any lipid-lowering agent at baseline or during the study period

| Lipid profiles            | Patients without lipid-lowering agent |                |            |                | P-value |
|---------------------------|---------------------------------------|----------------|------------|----------------|---------|
|                           | TAF 25 mg                             |                | TDF 300 mg |                |         |
|                           | N                                     | Median (IQR)   | N          | Median (IQR)   |         |
| Total cholesterol (mg/dL) |                                       |                |            |                |         |
| Change* at month 6        | 725                                   | 3 (-9 to 19)   | 2,608      | -5 (-23 to 12) | <0.001  |
| Change* at month 12       | 628                                   | 4 (-13 to 21)  | 2,210      | -6 (-25 to 12) | <0.001  |
| Change* at month 18       | 559                                   | 3 (-14 to 22)  | 2,030      | -8 (-27 to 12) | <0.001  |
| Change* at month 24       | 462                                   | 4 (-14 to 24)  | 1,851      | -9 (-27 to 12) | <0.001  |
| Change* at month 30       | 379                                   | 5 (-11 to 25)  | 1,678      | -8 (-27 to 12) | <0.001  |
| Change* at month 36       | 315                                   | 8 (-9 to 24)   | 1,568      | -9 (-28 to 12) | <0.001  |
| Change* at month 42       | 259                                   | 5 (-11 to 20)  | 1,456      | -8 (-28 to 13) | <0.001  |
| Change* at month 48       | 169                                   | 6 (-12 to 22)  | 1,392      | -7 (-27 to 13) | <0.001  |
| HDL (mg/dL)               |                                       |                |            |                |         |
| Change* at month 6        | 321                                   | 0 (-5 to 3)    | 957        | -2 (-9 to 1)   | <0.001  |
| Change* at month 12       | 281                                   | -3 (-8 to 3)   | 788        | -4 (-11 to 3)  | 0.018   |
| Change* at month 18       | 243                                   | -2 (-8 to 4)   | 706        | -5 (-12 to 2)  | <0.001  |
| Change* at month 24       | 189                                   | -2 (-10 to 3)  | 663        | -5 (-13 to 1)  | 0.003   |
| Change* at month 30       | 151                                   | -2 (-8 to 4)   | 586        | -5 (-13 to 1)  | 0.001   |
| Change* at month 36       | 125                                   | 0 (-7 to 6)    | 564        | -5 (-14 to 1)  | <0.001  |
| Change* at month 42       | 109                                   | -1 (-7 to 4)   | 522        | -6 (-14 to 1)  | <0.001  |
| Change* at month 48       | 57                                    | 0 (-8 to 4)    | 486        | -6 (-14 to 1)  | 0.002   |
| LDL (mg/dL)               |                                       |                |            |                |         |
| Change* at month 6        | 286                                   | 0 (-8 to 14)   | 487        | 0 (-12 to 10)  | 0.012   |
| Change* at month 12       | 248                                   | 4 (-12 to 17)  | 353        | -2 (-20 to 13) | 0.004   |
| Change* at month 18       | 217                                   | 3 (-10 to 16)  | 290        | -4 (-19 to 10) | 0.001   |
| Change* at month 24       | 164                                   | -1 (-14 to 16) | 252        | -6 (-22 to 9)  | 0.009   |
| Change* at month 30       | 132                                   | -1 (-14 to 10) | 203        | -6 (-22 to 11) | 0.094   |
| Change* at month 36       | 110                                   | 1 (-12 to 17)  | 197        | -5 (-24 to 12) | 0.022   |
| Change* at month 42       | 89                                    | -3 (-17 to 7)  | 162        | -7 (-25 to 9)  | 0.206   |
| Change* at month 48       | 42                                    | -2 (-18 to 9)  | 138        | -7 (-22 to 7)  | 0.284   |
| Triglycerides (mg/dL)     |                                       |                |            |                |         |
| Change* at month 6        | 326                                   | 0 (-12 to 20)  | 973        | -0 (-16 to 13) | 0.002   |
| Change* at month 12       | 285                                   | 3 (-15 to 27)  | 797        | -4 (-24 to 15) | <0.001  |
| Change* at month 18       | 248                                   | 6 (-11 to 22)  | 719        | -5 (-23 to 12) | <0.001  |
| Change* at month 24       | 193                                   | 5 (-14 to 28)  | 671        | -4 (-21 to 18) | 0.001   |
| Change* at month 30       | 156                                   | 6 (-13 to 33)  | 596        | -6 (-24 to 15) | <0.001  |
| Change* at month 36       | 132                                   | 9 (-13 to 25)  | 575        | -4 (-22 to 20) | 0.001   |
| Change* at month 42       | 113                                   | 12 (-8 to 36)  | 532        | -4 (-22 to 16) | <0.001  |
| Change* at month 48       | 61                                    | 4 (-14 to 28)  | 495        | -2 (-21 to 21) | 0.110   |

**Supplementary Table 5.** Continued

| Lipid profiles                | Patients without lipid-lowering agent |                      |            |                      | P-value |
|-------------------------------|---------------------------------------|----------------------|------------|----------------------|---------|
|                               | TAF 25 mg                             |                      | TDF 300 mg |                      |         |
|                               | N                                     | Median (IQR)         | N          | Median (IQR)         |         |
| Total cholesterol / HDL ratio |                                       |                      |            |                      |         |
| Change* at month 6            | 321                                   | 0.14 (−0.21 to 0.48) | 957        | 0.10 (−0.31 to 0.51) | 0.265   |
| Change* at month 12           | 281                                   | 0.23 (−0.16 to 0.56) | 787        | 0.15 (−0.34 to 0.54) | 0.080   |
| Change* at month 18           | 243                                   | 0.21 (−0.20 to 0.60) | 706        | 0.19 (−0.29 to 0.59) | 0.510   |
| Change* at month 24           | 189                                   | 0.26 (−0.09 to 0.63) | 663        | 0.17 (−0.29 to 0.62) | 0.075   |
| Change* at month 30           | 151                                   | 0.20 (−0.12 to 0.67) | 586        | 0.19 (−0.27 to 0.66) | 0.289   |
| Change* at month 36           | 125                                   | 0.17 (−0.20 to 0.55) | 564        | 0.22 (−0.27 to 0.66) | 0.681   |
| Change* at month 42           | 109                                   | 0.19 (−0.11 to 0.64) | 521        | 0.24 (−0.24 to 0.68) | 0.768   |
| Change* at month 48           | 57                                    | 0.27 (−0.15 to 0.76) | 486        | 0.25 (−0.23 to 0.74) | 0.682   |

TAF, tenofovir alafenamide; TDF, tenofovir disoproxil fumarate; IQR, interquartile range; HDL, high-density lipoprotein; LDL, low-density lipoprotein.

\*Indicates change from the baseline.
